# Supplementary material for: Circulating exosomes may identify biomarkers for cows at risk for metabolic dysfunction
Source: PubMed Central journal article supplement (PMC6761115; doi:10.1038/s41598-019-50244-7), 2019-09-25
Supplement: 41598_2019_50244_MOESM1_ESM.pdf [file 41598_2019_50244_MOESM1_ESM.pdf]

# Circulating exosomes may identify biomarkers for cows at risk for metabolic dysfunction

Fatema B. Almughliq, Yong Q. Koh, Hassendrini N. Peiris, Kanchan Vaswani, Olivia Holland, Susanne Meier, John R. Roche, Chris R. Burke, Mallory A. Crookenden, Buddhika J. Arachchige, Sarah Reed and Murray D. Mitchell.

## Exosomes from cows at low-risk for metabolic dysfunction

**TSG101 (45 kDa)**

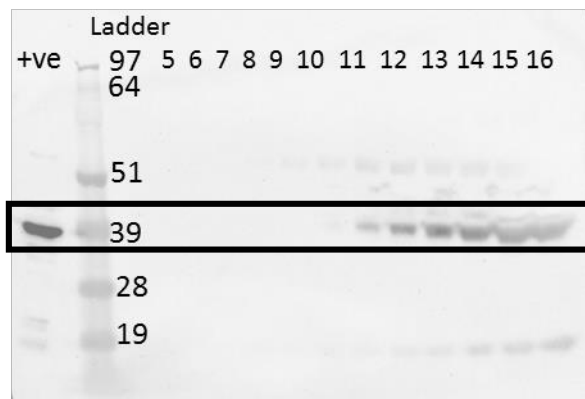

**FLOT-1 (49 kDa)**

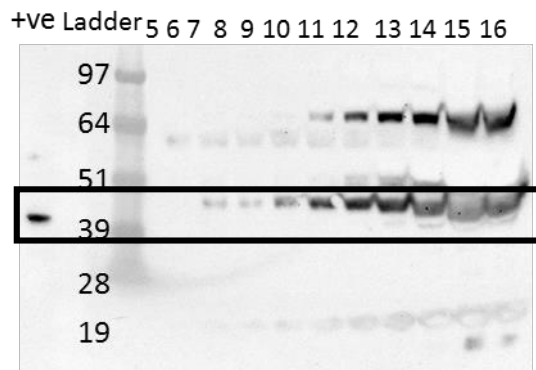

## Exosomes from cows at high-risk for metabolic dysfunction

**TSG101 (45 kDa)**

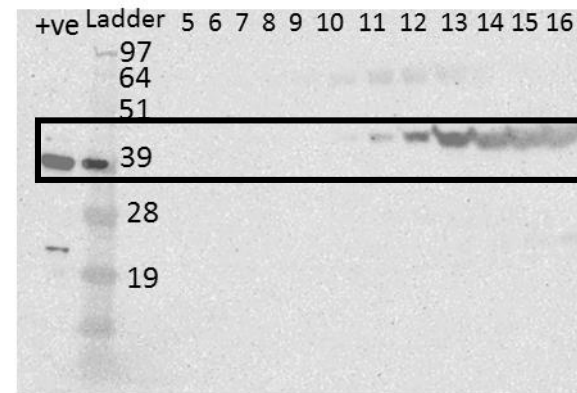

**FLOT-1 (49 kDa)**

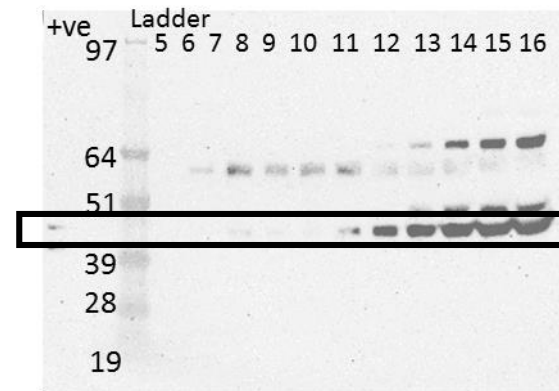

**Supplementary Information:** The full unedited blots used in Fig. 1A of exosomal fractions 5–16. The cropped blots presented in Fig. 1A are shown in the boxes.
